# Supplementary material for: Genome-Wide Analysis and Abiotic Stress-Responsive Patterns of COBRA-like Gene Family in Liriodendron chinense
Source: Plants (Basel). 2023 Apr 11;12(8):1616. doi: 10.3390/plants12081616 (PMC10143436; doi:10.3390/plants12081616)
Supplement: Supplementary file 1 [file plants-12-01616-s001.zip]

Archive with 11 entries (11 files):
- Figure S1.tif
- Figure S2.tif
- Figure S3.tif
- Figure S4.tif
- Figure S5.tif
- Figure S6.png
- Figure S7.tif
- Supplementary Figure.pdf
- Supplementary Table S1.xlsx
- Supplementary Table S2.xlsx
- Supplementary Table S3.xlsx
