# Supplementary material for: Genome-Wide Analysis and Abiotic Stress-Responsive Patterns of COBRA-like Gene Family in Liriodendron chinense
Source: Plants (Basel). 2023 Apr 11;12(8):1616. doi: 10.3390/plants12081616 (PMC10143436; doi:10.3390/plants12081616)
Supplement: Supplementary file 1 [file plants-12-01616-s001.zip › Supplementary Table S1.xlsx]

## Sheet: Supplementary Table S1
	Supplementary Table S1 Protein names and sequences of the COBL.
Subordinate Branch	Species Name	LocusName		Source	Protein sequences
		ID	Gene name
Cruciferae	A. thaliana	AT4G27110	AtCOBL11	phytozome	MKKLRYVHLNLLLLLLPLINLQFPTLSLAQDYDEPKKDDTPPPGLARCNGVYMSYSSGGREKLYPRTTNATAQAWSFKSTAMIVNTGIEEVKGWQMFVGFHHREIIVSATGAVSSDGDFPVDATNGTTFIGSQNTDLKTSILTAGDYTQISTNIEITGTVFGGKGTATPMPKSIKLTNDGWQCPAATSKGGTMQVCCKRNPKFKAKEKVKTKFMPRQHGDLNIIYDVLQAYASSYMAQVTIDNTSPLGRLDHWNLTWEWMRGEFIHSMRGAYAAEKNTLECLSSKAGQFYGDLDFSQVANCQKKPIIKDLPAERKDDNVTGKLPFCCKNGTLLPTHMDPSKSKAIFQLQVYKVPPDQNRTAFFPPRNWKIDGIVNPTYKCGPPIRVDATPFPDPSGLQA…
	A. thaliana	AT5G60920	AtCOB	phytozome	MESFFSRSTSIVSKLSFLALWIVFLISSSSFTSTEAYDALDPEGNITMKWDVMSWTPDGYVAVVTMFNFQKYRHIQSPGWTLGWKWAKKEVIWSMVGAQTTEQGDCSKYKGNIPHCCKKDPTVVDLLPGTPYNQQIANCCKGGVMNSWVQDPATAASSFQISVGAAGTTNKTVRVPRNFTLMGPGPGYTCGPAKIVRPTKFVTTDTRRTTQAMMTWNITCTYSQFLAQRTPTCCVSLSSFYNETIVGCPTCACGCQNNRTESGACLDPDTPHLASVVSPPTKKGTVLPPLVQCTRHMCPIRVHWHVKQNYKEYWRVKITITNFNYRLNYTQWNLVAQHPNLDNITQIFSFNYKSLTPYAGLNDTAMLWGVKFYNDFLSEAGPLGNVQSEILFRKDQSTF…
	A. thaliana	AT1G09790	AtCOBL6	phytozome	MGAMLNLLLVVTVILCSILSPTRFMIMIDKMVADGYDPLDPFGKIIIKWDLLLSSPGQHHVQVTLENMQEYRHVEKPGWKLSWHWLNQEVIWDMKGAETTEQGNCSAFASSGNLPHCCLERPTIVDLLPGASLNVQVANCCRGGVLTSMSQDHANHVSAFHMTVGSSPDGPEEFNMPSNFDIGVPGYSCDNATSVSPTKFSTDKGRRKTQALATWEAVCVYSQFRSSPSPKCCVSLSAFYYQNIVPCPTCSCGCSSSHCVKDGELPPYLEQKHDPDEEVSPVVKCSDHMCPIRIHWHVKVNYREYWRVKITATNFNTMKNYTNWNLVVLHPNLKSVQQVFSFNYKSLTPYQNSINDTGMFWGVQFYNDVLLQEGKIGNVQTELLLKKDMGNFTFREGWA…
	A. thaliana	AT3G02210	AtCOBL1	phytozome	MGFFLCSSSSIFFKFGISIIFLVSFSGLTPSEAYDPLDPSGNITVKWDIITWTGDGYVATVTVYNFQQYRHIQAPGWTLGWSWAKREVIWGMNGGQTTEQGDCSKFKGTIPHCCKKTPSVVDLLPGSPYNQQIANCCRGGVLNSWAQDPATAVSAFQLTVGQAGTTNKTVRVPKNFTLKAPGPGYTCSPAKIVKPTRFIGTDKRRVTQALMTWNVTCTYSQFLAQKTPTCCVSLSSFYNKTIVSCPTCSCGCRNTSQPGNCVDPKGPRIASVIPNPGKNAYIPPLVQCTKHMCPVRIHWHVKVNYKQYWRVKVTITNFNYNMNYSQWNLVVQHPNFDNLTQTFSFNYKPLTPYASINDTGILWGIKFYNDLLMQAGPFGNVQSELLFQKEASAFTFEKG…
	A. thaliana	AT4G16120	AtCOBL7	phytozome	MDSAPNFIPRLLLLSLLIVSIPLTSSQSDANTTNPSPSPPSDSDLCNGVFVSYTHTKGSKIPPNDTANQPYRFESVITVLNHGRDELKSWRVFVKFAHREILVSASNAVLSDGSSLPVSVENGTVFAGYPSSDLKSAIQTAGDVTQMQARVELVGTQFGVAPPNVPLPKNITLATDGWKCPKATQKGTNVLQVCCIPDPDYDNREIIDNEFLPRKDGDLTIMYDVVRSYSSNYMAQVTMENHNPLGRLDNWKLSFDWMRDEFIYTMKGAYPSIVDSSDCVDGPQAKHYQDLDFSNVLSCARRPTVIDLPPTKYNDSTFGLIPFCCRNGTILPRSMDPSKSSSVFQMQVYKMPPDLNISALSPPQNWRINGTLNPDYKCGPPVRVSPSQFVDPSGLPSNR…
	A. thaliana	At1g-	AtCOBL3	phytozome/NCBI	MNILFSRFSFLLLFLCSWTSFTFTTTEAYDALDPYGNITIKWDIMSWTGDGYVAVVTIFNFQQYRHIEAPGWQLGWSWMKKEVIWSMVGGQATEQGDCSKFKGNIPHCCKKTPAIVDLLPGTPYNQQISNCCRGGVISAWAQDPATAISSFQISVGQSGTTNTTVRAPRNITLKAPGPGYTCGPAKLVKPSRFISADKRRKTQSLLTWNITCTYSQFLARKTPTCCVSLSAFYNETIVPCPTCSCGCQNSSQAGTCVDYKEYWRVKVAITNFNYNMNYSQWNLVVQHPNFDNLTKLFSFNYKPLNPYLNINDTAMLWGIKFYNDFLSQAGPVGNVQSELLFQKNPLEFTFEKGWAFPRRIYFNGDNCVMPPPDSYPWLPNASPNIATSPFVILLITFLS…
	A. thaliana	AT3G16860	AtCOBL8	phytozome	MGLTRNFILWILLSSLFTAIQLTSSQRNTPPPRSKDADLCNGVFVSYTYLTGTKIKPNDTKNQPYRFESEITVLNNGRDELKSWQVFVKFAHREILVSATNAVLSDGSSLPASVENGTIFAGFPSADLKTAIMTAGDVTQMEARVELVGTQFGVAPPSVPLPKNITLVNDGWSCPKPTQQGSNVLQVCCTPNPNITTSKIGQKFLPRQEGDLTIMYDVTRAYQSSYSAQVTIENHNLLGRLDNWDLSFMWMKDEFLFSTKGAYPSVVDSSDCITGPQAKYYKDLDFSNVMSCARRPHIIDLPLTKYNDTNVGRIPYCCRNGTILPRSMDPEKSKSVFQIEVYKMPPDLNISSITPPQSWQIKGNLNPDYKCGPPLRVSSSQFPDTSGLPSNKSAFASWQ…
	A. thaliana	AT5G60950	AtCOBL5	phytozome	MESLFSTMIVLLLVSFSCLISTEALTSNYGNITVKWDLLNWTPDGYVAVVTAYNYQKQRSIPGWKMSWRGTKKEVIWNMLGAKTTGQGGCSMFKGNIPQSCVRKPTVVDLLPGTPFNQQIANCCKSGVLKPGSESAFQLSVGSAGNSVKTARMPANFMFTAPKQQYICGPSKNVRPTRFTTADKRRITAALMTWNITCVFHKAT*
	A. thaliana	AT5G15630	AtCOBL4	phytozome	MRLLFSFCFFFFMIIFTATAYDPLDPSGNITIKWDIMSWTADGYVATVTMNNFQIYRHIQNPGWTLGWTWAKKEVIWSMVGAQTTEQGDCSKFKGNVPHCCKKTPTVVDLLPGVPYNQQFSNCCKGGVIGAWGQDPSAAVSQFQVSAGLAGTTNKTVKLPKNFTLLGPGPGYTCGPAKIVPSTVFLTTDKRRKTQALMTWNVTCTYSQFLARKHPSCCVSFSSFYNDTITPCPSCACGCENKKSCVKADSKILTKKGLNTPKKDNTPLLQCTHHMCPVRVHWHVKTNYKDYWRVKIAITNFNYRMNHTLWTLAIQHPNLNNVTQVFSFDYKPVSPYGSINDTGMFYGTKFYNDLLMEAGPSGNVQSEVLLQKDQKTFTFKQGWAFPRKVYFNGDECMLP…
	A. thaliana	AT5G49270	AtCOBL9	phytozome	MGVLLPIFFGVLLLFTVTPPSMSQLPPTIMVPAPAPAPISPSDLCNGIFLSYDFILGRKIPPNDTADQPYRFESVLTVLNNGREELKEWRVFVGFQHNEILISATDALIVNGTELPALVGNGTIFGGYPVSDLKTAIQTAGDLKQMTAEIELVGTQFMVAPPAVPLPSNISLVNEGWLCPVPTLQSKRELTTCCIRDASIIVNTTITTKFLPRQPGDLTIMYDVIRAYDQNYLTEVTMENHNPLGRLDHWELSFDWMRDEFIQKMQGAYPTVVDATKCIFGPQSLIYTGLDFADVLTCERRPIIIDLPPTKKDDSTLGNIPSCCRNGTILPRIMDPSKSVSVFTMQVAKMPPDFNRSALFPPQNWRIKGTLNPDYSCGPPVRVTPTFYPDPSGMPTNKS…
	A. thaliana	AT3G29810	AtCOBL2	phytozome	MNILFSRFSFLLLFLCSWTSFTFTTTEAYDALDPYGNITIKWDIMSWTGDGYVAVVTIFNFQQYRHIEAPGWQLGWSWMKKEVIWSMVGGQATEQGDCSKFKGNIPHCCKKTPAIVDLLPGTPYNQQISNCCRGGVISAWAQDPATAISSFQISVGQSGTTNTTVRAPRNITLKAPGPGYTCGPAKLVKPSRFISADKRRKTQSLLTWNITCTYSQFLARKTPTCCVSLSAFYNETIVPCPTCSCGCQNSSQAGTCVDPKIASVVPALGKNNLEPLLQCTQHMCPIRVHWHVKTSYKEYWRVKVAITNFNYNMNYSQWNLVVQHPNFDNLTKLFSFNYKPLNPYLNINDTAMLWGIKFYNDFLSQAGPVGNVQSELLFQKNPLEFTFEKGWAFPRRIYF…
	A. thaliana	AT3G20580	AtCOBL10	phytozome	MRAIDVKTGMKIPWDVRYSLSLFIFLSSILFLSNGQDYGMPGEDGGGGAEPPPEMAHCNGIFMSYNFGSREREYPHVKNVTAQSWAFKSTAMIVNAGREELKGWQMFIGFRHKELIVSATGATPMDGDYPLDASNGTTFVGSPNMDLKTSIETAGDFTQISANIEITGTLFGVSKAVTPMPRTIKLTNDGWECPAAKRKGGSMHVCCKRNPKIKNKIGLKTKFAPRRYGDLNIVYDVLQSFDSNYLAQVTIDNDNPLGRLDRWNLTFEWMRGEFINTMRGAYTHKKDPSECLYSKAGQYYKDLDFSQVMNCQRKPAISDLPPEKKEDNMTGKLPFCCKNGTLLPPIMDPSKSRSMFQLQVFKLPPDLNRTALYPPQHWKIDGVLNPQYKCGPPVRVDPS…
Gramineae	O. sativa	LOC_Os03g18910	OsBC1L1	phytozome	MAGCIVVVFGVLVLVAGMAAAQGQVPSPTPAAAAAAPAPTPDCNGILLTYNFEGRAKIRPYVADRNKQPYSFRANATVLNSGTRPLKSWAMLVTFGYGEILVGVDGAVLTGGGEMPYNTTQDAGNATSFSGYPQTDLLTPIATAGDISQIQAKVGIVGTLFAGPGPFVPLPTALSLDDPAYRCPQETNVSSGVLSTCCVLTPEAEANATVINANATDPTKNFLPRGTGDLVITYDVLQAYPSSYLALVTLDNNAKLGRLDNWRLSWEWRRGEFIYSMKGAYPSEKDTTGCIYGAAGQYYQSLDFSQVLNCDKKPVILDLPLSRYNDTQIGKIDHCCRNGTILPKSMDETQSKSAFQLQVFKMPPDLNRTKLFPPANFKIAGASSLNPDYTCGQPVPVSP…
	O. sativa	LOC_Os03g30250	OsBC1	phytozome	MELHRCSLLALLLAVTCSVAVAYDPLDPKGNITIKWDVISWTPDGYVAMVTMSNYQMYRQILAPGWTVGWSWAKKEVIWSIVGAQATEQGDCSKFKGGIPHSCKRTPAIVDLLPGVPYNQQIANCCKAGVVSAYGQDPAGSVSAFQVSVGLAGTTNKTVKLPTNFTLAGPGPGYTCGPATIVPSTVYLTPDRRRRTQALMTWTVTCTYSQQLASRYPTCCVSFSSFYNSTIVPCARCACGCGHDGYRGNGGGGKNARAGDGRSRRNSGGGGGHSGGTECIMGDSKRALSAGVNTPRKDGAPLLQCTSHMCPIRVHWHVKLNYKDYWRAKIAITNFNYRMNYTQWTLVAQHPNLNNVTEVFSFQYKPLLPYGNINDTGMFYGLKFYNDLLMEAGPFGNVQ…
	O. sativa	LOC_Os03g30260	OsBC1L2	phytozome	MARFLLGAAAIALLAGVSSLLLMVPFAEAYDPLDPNGNITIKWDITQWTPDGYVAVVTIYNFQKYRHIQAPGWSLGWAWAKKEIIWSMAGGQATEQGDCSAFKANIPHCCKRDPRVVDLVPGAPYNMQFGNCCKGGVLTSWVQDPLNAVASFQITVGHSGTSNKTVKAPKNFTLKAPGPGYSCGLAQEVKPPTRFISLDGRRTTQAHVTWNVTCTYSQFVAQRAPTCCVSLSSFYNETIVNCPKCACGCQNKKPGSCVEGNSPYLASVVNGPGKGSLTPLVQCTPHMCPIRVHWHVKLNYRDYWRVKVTITNWNYRMNYSQWNLVVQHPNFENVSTVFSFNYKSLNPYGVINDTAMMWGVKYYNDLLMVAGPDGNVQSELLFRKDRSTFTFDKGWAFPR…
	O. sativa	LOC_Os03g54750	OsBC1L3	phytozome	MAAGGGAGSARSVAWGASALLVAALLLSAPSATEAYDSLDPNGNITIKWDVMQWTPDGYVAVVTMFNYQQFRHIQAPGWQLGWTWAKKEVIWSMVGAQTTEQGDCSKFKGNPPHCCKKDPTIVDLLPGTPYNMQIANCCKAGVINTFNQDPLNAASSFQISVGLAGTTNKTVKLPKNFTLKAPGPGYTCGRAMIVRPTKFFTNDGRRATQALMTWNVTCTYSQFLAQKTPTCCVSLSSFYNDTIVNCPTCSCGCQNNGTSPGSCVNSYRGPNFLQKL*
	O. sativa	LOC_Os04g45700	OsBC1Lp1	phytozome	MDVDQLILFVFVCCLSSRFADAYDPVDPNGNIIINWDFQSIENVYTVMVSVHNHQLYRHIEQPGWRLSWRWAGNEIIWGMTGAEATEQGDCHRIRGATRPHCCEKQPVIVDLPPGTPYNNQVSSCCRGGVLSSLTQNNRTSTAAFQMVVGGFRRATYHDGDRGPALPSRFGVGVPGYSCSNATKVNATSEGEKPELPAGDGEAVAPVFRCTDHMCPVRVHWHVKISYREYWRVKVTITNYNQVKNYSDWNLVVQHPNLRSLTQLFSFNYQPLIEYGTLNDTGMFWGIQYYNEMMLQDGNVQTEMILKKDKSDFTFSGGWAFPRRVYFDGHECVMPPPDQYPLLPNGGPDSRVSAAQLIASSCLLLPFIFLIM*
	O. sativa	LOC_Os05g32110	OsBC1L4	phytozome	MAVGGAGSSRSVAPCCCCAVLLAAALLFSAPATTEAYDALDPNGNITIKWDVMSWTPDGYVAVVTMFNYQQFRHIQAPGWQLGWTWAKKEVIWSMVGAQTTEQGDCSKFKGGTPHCCKKDPTVVDLLPGTPYNMQIANCCKAGVINTFNQDPSNAASSFQISVGLAGTTNKTVKLPKNFTLKAPGPGYTCGRAMIVRPTKFFTGDGRRATQALMTWNVTCTYSQFLAQKTPSCCVSLSSFYNDTIVNCPTCSCGCQNNGTSPGSCVNENSPYLQSAIDGPGKWTGQPLVQCTSHMCPIRIHWHVKLNYKEYWRVKITITNFNYRMNYTQWNLVAQHPNFNNITQLFSFNYKPLTPYGSKINDTAMFWGVKFYNDLLMQAGPLGNAQSELLLRKDSKDFT…
	O. sativa	LOC_Os06g47110	OsBC1L5	phytozome	MPLRRRWAALLLGVAVVLAVAAAGARAQDYNNGGGGDGEDEEEEEKPSFKAQEACNGAFLTYTFTEREKEYPRTKNATAQAFAFKATATVLNTMTEDLKAWQMFVGFQHKEILVTVGGAVLLDGTDLPANVSGGVTFAGYPMANLLNSIETAGDLTQIQAQIDITGTQFGVKPPTAPMPRTIKLSNPGFRCPKPTHKQSVMYVCCVKDPKFKAKKVNTTTRYLPRQKADLTIAYDVLQAFGNNYMVQVTIDNWSPIGRLDNWNLTWEWKRGEFIYKMRGAYTLNKEGPACVYSPAAGYYKDFDFTPAYSCEKRPIVVDLPPEREKDKDVGNIPFCCKNGTLLPPTMDESKSRAVFQMQVFKLPPDLNRTALYPPQNWKIIGKLNPQYACRQPVRVSPVV…
	O. sativa	LOC_Os07g41310	OsBC1L6	phytozome	MALLLLRMGVSVALLVAFFSSLIPSSEAYDPLDPNGNITIKWDVLQWTPDGYVAVVSLYNYQQYRHIQSPGWKLGWVWAKKEIIWAMNGGQATEQGDCSKFKSNIPHCCKKDPEIVDLLPGTPYNMQIANCCKGGVLNSWAQDPANAIASFQVSVGQAGTTNKTVRVPRNFTLKSPGPGYTCGSAKVVRPTKFFSQDGRRTTQAHMTWNVTCTYSQIVAQRSPTCCVSLSSFYNDTIVNCPTCSCGCQNNKPGSCVEGNSPYLASVVNTHNKDSLTPLVQCTSHMCPIRVHWHVKVNYKEYWRVKITVTNFNYRMNYSQWNLVTQHPSFDNLTTIFSFNYKSLNPYGVINDTAMLWGIKYYNDLLMTAGPDGNVQSELLFKKDPKSFTFEKGWAFPRRV…
	O. sativa	LOC_Os07g41320	OsBC1L7	phytozome	MAVLGSLLLLILAATLSVAVAYDPLDPNGNITIKWDVMSWTPDGYVAMVTINNYQTYRQIMAPGWTVGWTWARQEVIWSMVGAQATDQGDCSRFKANLPHCCRRTPAVVDLLPGVPYNQQIANCCRGGVLPAYGQAPSAAAAAFQVSVGQAGTTNRTVRLPRNFTLLGPGPGYTCGRARVVPSTVFLTADRRRKTQALSKLTTPSSSSPAPPLMMSCLCAVTWNVTCTYSQHLASKYPSCCVSFSSFYNDTIVPCAKCACGCDAHKPCVRSERDGKRLAVTGKKHDANANAHGRGNGVAAAAMAAPLLQCTTHMCPVRVHWHVKLNYREYWRAKITIVNFNYRMNYTGWTLVAQHPNLDNITEVFSFDYKPVVSYGSINDTAMFYGLKYFNDQLMEAGP…
	O. sativa	LOC_Os07g49080	OsBC1L8	phytozome	MAVFIIANNPLARYAVLFAAAVFLVAAAQAQPTTPPPPPPPEMDCNGILLTYNLDRRDKIRPFVAAPEADAQPYSFRATATVLNSGTRALRSWTLRLTFHHREILVQLDGAVLTSGADLPYNTTADNATSFSGYPQTDLLTPIATAGDLTKIQATLNLVGTLFAGPPPYVPLPSALSLADPSYTCPPAINVSTSTLSTCCILTPEAAANASAGDLDAGRATSYLPRGAGDLVITYDVLQAHETTYLAQVTLENDALLGRLDGWELSWEWLRGEFISSMRGAYPRQVGATDCVYGAQGAFYKGLDFSKVLNCDRKPAVLDLPPSRRGDEDIGGIDHCCRNGTMLPKSVDAAQSKSAFQMEVYKMPPDLNRTKLYAPANFRVSGASPLNPEYACGQPVRVT…
	O. sativa	LOC_Os10g35460	OsBC1L9	phytozome	MAIGVGGCCAVLLAAALLFSSPATTYAYDSLDPNGNITIKWDVMQWTPDGYAAVVTLSNYQQFRHIQPPGWQLGWTWQQKEVIWSMYGAQAIEQGDCSMSKEGSNVPHSCKKHPTVVDLLPGAPIDLQIANCCKAGSLSAFSQDPANSAASFQIIVGHSGNSNETVRVPKNFSLMAPGPGYTCSRAMIVKPSRFLSPDGRRATQVLMTWNVICTYSQFLAQKVPSCCVSLSSFDNDKTVDCPTCSCGCRNEKSTTGKCVKKNAPDLQSIIHGPGRWTWQPLLQCTSHMCPVKINWHLMLKDKEHYRVKITVTNLNYRMNFTEWNLVVQYHPILDITQISGFNYKSIQVGKINDTTMLWGVKPYYDLLMQAGPLGNVQGELIVRKDFRASSTTNNNKGRA…
Vitaceae	V. vinifera	VIT_203s0038g01420	VIT_203s0038g01420	phytozome	MTLWIPMGTSQLLLILINGQMMAMWLLFWLRLSNCLLQARVTIQNYYQYRHVEKQGWKLGWTWAKDEVIWSMSGAFATQQGNCSSFIVQTPHSCLKNPVIVDLEPTAAPENMTEDCCHGGILSAWAIIPSNSFSSFEIMVGNLEGNTHGNKPLNLTLMAPGPGYTCSPIEDTDPTVSLVIGGRREIQVFRTWKSTCTYSTFLSNKVPVCCVSLSTFYSPTITTCPQCSCGCRDANPSTDSCIRCVPRYHS*
	V. vinifera	VIT_205s0077g01470	VIT_205s0077g01470	phytozome	MAFSLIRLLVLDLIVAALIPIALCQSEAPSPTADSCNGIFLSYAYTSGAKIPPNLNSDPTEQPYRFESTLTVLNNGLEELKSWRVFVGFQHKEYLVSASGAVLANGTSLPATVGGGVVFAGYPSTDLKTAIETAGDTTQMQIQVQFVGTQFGVGSPNVPMPTNVSLVNDGFVCPKPTMQGTSEMQVCCTKDSNYKSNVSSDDEFLPRQNGDLTIMYDVTRTYESSYWAQITISNHNPLGRLDDWKLSWDWMKGEFINSMKGAYPDIVDTTDCIFGEQGQYYQDLDFSNVLNCERRPTIIDLPPTKANDTTLGLIPFCCRNGTILPPTMDPSKSTSVFQMNVYKMPPDLNRSELTPPQNWNISGTLNPDYQCGSPVRVSPSEFPDTSGLPSNSTAVASWQ…
	V. vinifera	VIT_207s0005g01020	VIT_207s0005g01020	phytozome	MARLLFFFIVIIIFFFISLPLSLSQSTAEESCNGIFLSYNYTSGHRLPPTLIPSDPSQQPYRFESNLAILNNGLRELKSWRVYVGFEHGEVLVSASHAVLDDGSLLPANVGNGTVFSGFPERDLKTAVETAGYLPRMRAQVQLVGTQFGVTDPDVPLPSTITLANDGFSCPNPTKLNFWMHVCCTEDSRSNFTTGEDLQPLQNGDVTIMYDVIRSYETNYRAQVTISNHNPLDRLDNWKLSWEWKRDEFIYAMKGAYPSVVDSTDCIFGKPGESYKDMDFSNALNCERRPTIIDLPPTMVNNSDLGMIPFCCRNGTILPPTMDQSKSVSVFQMQVFKMPTEFNRTQLIPPQNWKIRGEVNQDYQCAPPVRVSQSQFPNPSGLPSESTAIATWQVACNKT…
	V. vinifera	VIT_210s0116g00620	VIT_210s0116g00620	phytozome	MVWRLLVYMFFISFTSDQFIRAQDYTDYVPPAPPPEEENCDGIFVSYTFISRQKEFPHVKNASAQAWAFKAMATVLNAGTFELKAWKIFIGFQHDEILVSAGGAVVMNGDDMPAAVGNGTYLSGFPQTDLKTSIETAGDLTQIEVQIPITGTQFGVKPPGVPMPRTISLANDGYKCPKPTVKKTAMHVCCTRKPKFKVKTESTKFLPRQYGDLSFVYDIIQAYDGNYLAQVTIENNHPLGRLDHWNLTWEWMRGEFINTMRGAYTHKIDSTDCIYGAAGQYYKGLDFSQVMNCEKNPIIGDLPSEKAKDDKVGFIPHCCRNGSLLPTIMDQTKSKAAFQLQVYKIPPDMNRTVLFPPQKWKIVGVLNPDYKCGPPIRVDPTEFPDASGLLQVTSSAIAS…
	V. vinifera	VIT_212s0035g00630	VIT_212s0035g00630	phytozome	MGWSWILIIQLNFLIGNADGYDPLDPNGNIAIKWDVLQWSSSSYDARVSIINYQLYRHIETPGWKLSWTWPGDEVIWDMWGALAHEQGNCSEFKGEQLPYCCEKTPLILDRGPGTPFNKQVANCCRDGLLTSMIQDPSKHGAMFQMNVGTASSNVSDMTMPRNFSLGVPGYTCGDPFQVPPSRFPEEGGRRWTQALMTWNVSCSYSQFLASTAPTCCVSLSAFYNSTIVPCPQCSCGCEGIPGTKCAKPGETPLLLPQGDGQQPDLVRCSRHMCPIRVHWHVKTSYREYWRVKITVTNLNLVKNYSAWNLVVLHPNLQSITQVFSFNYRSLNEHGTINDTGMFWGIQYYNELLLQAGESGNVQTEMLLHKDPGIFTFREGWAFPRKISFNGDQCVMPSP…
	V. vinifera	VIT_214s0083g01150	VIT_214s0083g01150	phytozome	MRFVISAFFFLMMFSYTAAYDPLDPNGNITIKWDIMSWTPDGYVAVVTMHNFQMYRHIISPGWTLGWTWAKKEVIWSMVGAQTTEQGDCSKFKGNIPHCCKKTPTVVDLLPGVPYNQQFSNCCKGGVVSSWGQDPAASVSAFQVSVGLAGTSNKTVKLPKNFTLLGPGPGYTCGIAKIVPPTNFLTPDRRRKTQALMTWNVTCTYSQLRARKNPSCCVSFSSFYNETITPCPSCACGCQNKNNCVQSDSKLLSMVGINTPRKDNVPLLQCTHHMCPVRVHWHLKINYKDYWRVKVSITNFNYRLNYTLWTLVVQHPNLNNVTQVFSFDYKPLVPYESINDTGMFYGMKFYNDQLMEAGPFGNVQSEVLFQKDNSFTFKQGWAFPRKVYFNGDECMLPLP…
	V. vinifera	VIT_214s0083g01160	VIT_214s0083g01160	phytozome	MGFCLSLISRSISSFCGCTILLLFLLSCSCFTSTEAYDALDPNGNITIKWDIMSWTPDGYVAVVTMYNFQQYRHIQSPGWSLQWTWAKKEVIWSMLGGQTTEQGDCSRFKGNVPHCCKKDPTVVDLLPGTPYNQQIANCCKGGVVSSWVQDPANAASSFQVSVGSAGTTNKTVRVPKNFTLKAPGPGYTCGPAKIVKPTRFVTQDGRRVTQALMTWNVTCTYSQFLSQKTPTCCVSLSSFYNDTIVPCPTCTCGCQNNITQPGSCVEEDSPYLASVVSGSGKNSYTPLVQCTKHMCPIRVHWHVKLSYKEYWRVKVTITNFNYRMNYTQWNLVVQHPNFDNLTQIFSFNYKSLTPYAAINDTAMLWGVKFYNDLLVQAGPLGNVQSELLFRKDKSTFTF…
	V. vinifera	VIT_217s0000g05060	VIT_217s0000g05060	phytozome	MTINQMSVTDISIINHRNIHIMEFNRVAYSIVSAVFFSMVLSPAVAYDPLDPNGNITIKWDVMSWTSDGYVAVVTMSNFQMYRHIMSPGWTLGWIWAKKEVIWSMVGAQATEQGDCSKFKGNIPHCCKRNPTVIDLLPGVPYNQQIANCCKGGVVASWGQDSSAAVSSFQLSVGLSGTSNKTVRLPKNFTLLGPGPGYTCGQAKTVPSSIFLSSDGRRKTQALMTWNVTCTYSQMVVSKYPSCCVSFSSFYNSTITPCTSCACGCQNKNNCIMSDTKIESVVGLHTPTKDNMPLLQCTQHNCPVRVHWHVKVNYKEYWRVKITITNFNYRMNYTQWTLVAQHPNLNNITQVFSFAYKPLIPYTSINDSGMFYGIKFYNDVLMEDGPDGNVQSEMILQKD…
	V. vinifera	VIT_217s0000g05070	VIT_217s0000g05070	phytozome	MEFFFTSIARSITKLSSYAILLVLLFSCSIFTSTEAYDSLDPEGNITIKWDVMSWTPDGYVAVVTMFNFQQYRHIQAPGWSLGWSWAKKEVIWSMMGGQTTEQGDCSRFKGNVPHCCKKDPTVVDLLPGTPYNQQIANCCKGGVINSWVQDPANAASSFQVSVGAAGTTNKTVKLPKNFTLRAPGPGYTCGPAKIVKPTKFTTADQRRVTQALMTWNVTCTYSQFLAQKTPTCCVSLSSFYNNTIVSCPTCTCGCQNNLTHPGSCVDPNNPYLASVVEGSGKTSYQPLVQCTSHMCPIRVHWHVKLNYKDYWRVKITITNFNYRMNYTQWNLVVQHPNFDNLTQIFSFNYKSLTPYAAINDTAMLWGVKFYNDLLSQAGPLGNVQSELLFRKDKATFTF…
	V. vinifera	VIT_219s0177g00160	VIT_219s0177g00160	phytozome	MKTKTCMKIPWNIVLFSCVLLFYISPKVQVCRGQDEDIDAPPPLPLEEEECNGIFLSYTFISRQKAFPRLKNASAQAWAFKSTATVMNTGLDELKAWKIFIGFQHEEILVSADGAVIADGDDFPAAVGNGTYLSGYPQADLKTSVETASDLNQMQVQIPMTGTQFGLKPPAVPMPRTIRLENDGYKCPNPTRRGSSMHVCCAKDPKYKAREEKSTKFSPRRNGDLSFSYDVLQASDSNYLAQVTIDNKNPIGRLDHWNLTWEWMRGEFIYNMRGAFTRKKDSSECIYGEAGQYYKTFDFSAVMNCEKRPVIVDLPADRAKDEKVGNLPYCCRNGSLLPSTMDVSRSRSVFQLQVYKLPPDLNRTALFPPQNWEVDGVLNPHYKCGPPIRVDPTEFPEPS…
Amborellaceae	A. trichopoda	evm_27.TU.AmTr_v1.0_scaffold00008.28	AmTr_v1.0_scaffold00008.28	phytozome	MVTILNFEQYRHISSPGWRLGWTWEKREVIWWMQGAQAIEQGNCSEFKKNLPHCCKRNPVIVDLLPGTNFNKQAPNCCRGGVLSSRVQDSSRAVSSFQLAVGCAKNTLSTVIPPVNFMISGPGPGYTCSNPINGNVSIFIDPDGRRTTEALKSWNVTCIYSQTLAHKGPTCCVSLSSFYNPDIVPCPLCSCSCQDMPSLAGQCVNGNSSVLEMHTSKSPLEEAKDIVRCTRHMCPVRIHWHVMLSYKHLWRVKITLNNFNHAKNYTDWNLVAQHPNLGSINQVFSFNYQPLDRYGGTVNDSGMFWGIKGYNDILLQGGNVQTDILLNKDQGAFTFSHGWAFPRRIYFNGDDCVMPPPDAYPTLPNGSLPAPLDSALSLVLVGFLSVLVLLLGV*
	A. trichopoda	evm_27.TU.AmTr_v1.0_scaffold00041.268	AmTr_v1.0_scaffold00041.268	phytozome	MSRPYLQILFFQELLLLLLLESCYIADCYDPLDPNGNITITYDIISWTTETDGYWAKVTIENYYQYRHVEKPGWKLGFDWAENEVIWSMTGALATQSGNCSAFKYRVPHCCQRSPEIIDLMPDAARINRSENCCRNGVLAARDIDPKNAISIFYMTVGNLPSLWTGKTPKNVTFMAPGPGYTCSPFADYSPTIFPSVGGRRETQAIRTWKSTCTYSQFIANKAPTCCVSLSSFYDSNVTPCPRCSCGCQAQERTSLSCIGDTKFRGSSLPVGEVEEGLVRCTSHMCPVRVHWHVKNNYMYHWRVKLTVTNYNYAANYSKWNIMVQHPGFSQATTAFSFNSTTLDTTTSPNEAALFWGLEYVNGELLQADNTGFGSVTSEILLHKDRKSFSLRNGWAFPR…
	A. trichopoda	evm_27.TU.AmTr_v1.0_scaffold00047.162	AmTr_v1.0_scaffold00047.162	phytozome	MASTISTNQLILSLPLKSLSSSSLTTLWHKPMSECPSSSSSSSPPSVKAVVNMHNFQMYRHIMSPGWTLGWTWAKKEVIWSMVGAQTTEQGDCSKFKGSIPHCCKKTPSVVDLLPGVPYNQQYTNCCKGGVVAAWGQDPLASISAFQVSVGLAGTSNKTVTLPKNFTLLTPGPGYTCGPAKTVPATTFLTTDGRRKTQALMTWNVTCTYSQFLARKSPSCCVSFSSFYNETIIPCPNCACGCQNNNTCIQSDSKLLLKPGVNTPRKDNAPLLQCTKHMCPIRVHWHVKVNYKEYWRVKIAITNFNYRLNYTQWTLVVQHPNLNNVTQVFSFDYKPLLPYGSINDTGMFYGMKFYNDLLMEAGPFGNVQSEILLQKDAQTFTFKQGWAFPRKIYFNGDEC…
	A. trichopoda	evm_27.TU.AmTr_v1.0_scaffold00047.163	AmTr_v1.0_scaffold00047.163	phytozome	MSWTPDGYVAVVTMYNFQQYRHIQAPGWTLGWTWAKSEVIWSMVGAQATEQGDCSKFKGNIPHCCKKDPTVVDLLPGTPYNQQIANCCKGGVINSWVQDPAGALSSFQISVGKSGSTNRTVRVPKNFTLKAPGPGYTCGPAKVVKSSRFLTGDGRRTTQALMTWNVTCTYSQFLSQKTPTCCVSLSAFYNETIVPCPTCTCGCQNNITQPGSCVEGDSPYLQQAITNTGKNNYAPLVQCTNHMCPVRIHWHVKLNYKEYWRVKITITNFNYRMNYTQWNLVVQHPNFDNLTQIFSFNYKSLTPYGPAINDTAMLWGVKFYNDLLMEAGPFGNVQSELLFKKDASFTFKQGWGLPRRVYFNGDNCVMPPPDSYPWLPNSSPHLKMTKLPLAMFCLTTIAL…
	A. trichopoda	evm_27.TU.AmTr_v1.0_scaffold00047.164	AmTr_v1.0_scaffold00047.164	phytozome	AVVSIYNLQQFRHIGAPGWTLGWTWSEKEVIWSMVGAQTTKQGDCSRFKGNIPHSCEKGPEVVDLLPGTPFNQQIANCCKGGVLSSMVDPENTLSAFQLSVGAAGTSKRTVLLPKNFTLIAPGPGYTCGPAKAVTPTRFITPDGRRVTQALMTWNVTCTYSQFLAHKTPTCCVSLSSFYNHTVTPCPTCSCNCGKYSTQPGRCIKGGSSHSTPKENQSPMVQCTNHMCPVQVHWHLKLDFKDYWSVMITITNFNYHVNYTEWNLVIQNPNFNNLIRTFNSNYKSFTPYGGINDTAVLWGVKKHNDILLQAGRKGFIQSKLIFKKNTGNFTPEKGWAFPRRVYFNGDICVLPRPDAYPWLPPSSHP*
	A. trichopoda	evm_27.TU.AmTr_v1.0_scaffold00057.89	AmTr_v1.0_scaffold00057.89	phytozome	MGFHVHLLLLASVTLILQFQSSISQTVSAPSPSINQCNGIFLSYSVDSITRIYPFLSDPSAQPYAFSATATLINTGEDDLKSWQMFIGFKHKEILVSASQAVLSDGADFPAEVGNGTFINGFPQTDLKNAIDTAGDVNQIEVKVTLTGTEFGVAPPAFPMPSNISLANEGYNCQKPTVQNNLMYICCAKDQNAKPNITQATKFSPRQDGDLTIDFDVLQSYQSNYLAQVVISNENPLGRLDHWNLTWDWMRGEFIQTMRGAYTLIEDSSDCIFGEQGAFFQGLDFTKVMNCQRTPTIVDLPLDKTNDTNIGLIPFCCRNGTLLPPHMDPSKSKAAFQLQVYKMPPDLNRTMLYPPQNWKISGILNPDYKCGHPVRVDPTLFPDTSGLRSFTSAIASWRV…
	A. trichopoda	evm_27.TU.AmTr_v1.0_scaffold00066.228	AmTr_v1.0_scaffold00066.228	phytozome	MAPTFSLLPFPLFSPAKTPEPGERKLPKLMMKPIPIFSVLLILLFSLARSQEVGQALSPSEEDCNGIYLSYVFVSREKEFPRIKNASAQPYAFSAIATILNAGVHDLKGWKIFIGFQHNEILVSAGQAVLYDGSELPAHVGNGTYFSGYPQSDLKNAIDTAGDMTQIQVQIEIKGTQFGVKSPRIPMPKTIKLANDGYKCPAPTLKRSEMDVCCVLDPKYKAKAVADTKFLPRQNGDLTLSYDVLQAYGSNYLAQVSMSNNHPLGRLDNWNLTWDWMRGEFIYTMKGAYTLKKDASGCIYGPAGNYYQSLDFATVMNCQKKPIIADLPPERANDAQVGLISNCCKNGTLLPPTMDSSKSKAAFQLQVYKIPPDLNRTALYAPQNWKINGLLNPDYKCGP…
	A. trichopoda	evm_27.TU.AmTr_v1.0_scaffold00232.2	AmTr_v1.0_scaffold00232.2	phytozome	MSRPYLQILFFHELLLLLLLESCYIADCYDPLDPNENITITYDIISWTTDTDGYWAKVTIENYYQYRHVEKPGWKLGFDWAENEVIWSMTGALATQSGNCSAFKYRVPYCCQRSPEIIDLMPDAAPINRSENCCRNGVLAARDIDQKNAISILYDRGELTQPLDREDTKECDIHGSWTRLHM*
Magnoliaceae	L. chinense	Lchi01857	LcCOBL1	phytozome/This study	MKDMFRLSFGCFLLVLSFLLMEFSPTDGYDSMDPNGNITVKWDVVEFDDDVYTALVTIYNNQLYRHVERPGWRLGWAWEKDQVIWKMWGAEATGARQLLQVPRQHTTLLREEAVFSPRGFPKTKGADGVRLLRRGTSHVPTHNSGRRRARHAVYRCQSFYNSTIVPCPQCSCSCPGPMSTTKCVKPDESPSLLRMPHDENDAVPPVVMCTRHMCPIRVHWHVKVSYREYWRVKVTVTNFNYVKNYSEWNLVVQHPNLQSVTEVFSFNYKPLHQYGLVNDTGMFWGIDHYNNMLLQSGELGNVQTEILLRKDSGLFTFNEGWAFPRKISFNGDECVMPPPDAYPKLPNASPSHSLAISCTSIGFSLLFLFLILVS
	L. chinense	Lchi02570	LcCOBL2	phytozome/This study	MKLGASHFSLFLLLTATIFSSVIGFDSRDPRGNITVRWDVISWTPDGYLAVVNITNYQTYRPVQAPGWQLSWTWSKREVIWNVLGATAMNQGDCSHYKGNIPSSCEKRPTIVDLTAGAPLTSQIKGCCRGGTLTAREQDMETSTAGFQLAVGAAGTTNATVALPQNFTLLAPRAGYTCGIARKVDPTRFVTPDGRRVTRALTASKIRGAQGELIQARESEKKQPKGRYKGAQSDKKMSKANFSKTSHFPSLLLQDILSLFSFIHSHPLYFAYLIFFFPYIIHLLSFLYPLLLSTSLLLLSLLTISPHLETAPRCGLVVNACQAILNVLRTKLDGDDDAAELGLFEPLASMASELEACMGPHAMPELETLMAGPHALTYSGSGNSPRGEELVESYLGEDP…
	L. chinense	Lchi12311	LcCOBL3	phytozome/This study	MGFSNFYSMKRCSSKLTKFTILLVFLLFCCTFTSTDAYDSLDPTGNITIKWDVMQWTPDGYIAVVTIFNFQQYRHIQAPGWTLGWTWAKKEVIWSMVGAQTTEQGDCSRYKGNIPHCCKKDPTVVDLLPGTPYNMQIANCCKGGVINSWVQDPANSASAFQISVGAAGTTNKTVKLPKNFTLKAPGPGYTCGIASIVKPTQFLTQDGRRTTQALMTWNVTCTYSQFLSQKTPTCCVSLSSFYNETIVPCPTCTCGCQNNITQPGSCAEGNSPYLASAISSGGKNNHAPLVQCTSHMCPIRVHWHVKLNYKEYWRVKITITNFNYRMNYTQWNLVVQHPNLDNLTQLFSFNYKSLNPYQQITL
	L. chinense	Lchi14677	LcCOBL4	phytozome/This study	MGMERFEDPIRGSSDKIHGNVCRRQFRFDRIMELRFAIAAFFFVCVFSRAAAYDPLDPDGNITIKWDVMSWTPDGYVAVVTMNNFQMYRHIISPGWTLQWSWAKKEVIWSMVGAQTTEQGDCSKFKGNVPHCCKKTPTVVDLLPGVPYNQQFSNCCKGGVVSSYGQDPAGSVSAFQVSVGQGGTSNKTVKLPKNFTLLGPGPGYTCGPANIVPSTTFLTPDQSTEDASSE
	L. chinense	Lchi20746	LcCOBL5	phytozome/This study	MAFNLLPMFLLFSSIFIPSAISQTLSPADACNGIFLTYTFNQRTRIHPFLLDPDRQPYSFLSTATILNAGAEDLKSWKLFIGFQHDEILVSANPAVLSDGSSFPASVGKGTSFSGFPNTDLKTAIETAGDLTQIQVQIQLVGTQFGVRSPGIPMPSNISLANDGYKCPSPTVGGNSTFVCCTKDAYFKVNITEEEFLPRQDGDLTIAYDVLQAYESKYLAQVTISNHNPLGRLDNWNLEWEWMRGEFIDSMRGAYTTAVDPTDCIFGVQGAYYQALDFSKIMNCQKSPTILDLPLTKANDSAVGLIPFCCRNGTILPRTMDPSKSTSAFQLQVYKMPPDLNRTVLFAPQNWKISGRLNPDYQCGPPVRVSPTQFPDTSGLESTASAIASWQVVCNITQP…
	L. chinense	Lchi21892	LcCOBL6	phytozome/This study	MVLRALLFTSFLVCYMVSNSHAQDYDEEKAAPPPALNNCNGIFLSYAFTSREKEFPHVKNATAQAYAFQATVMILNASPNDLKAWKMFIGFQHDEILVSADGAVIMDGEDLPARVGNGTYLSGYPQTDLKTSIETAADWNQIQVTIDLKGTQFGVKPPGIPMPKTIRLANDGYKCPAPVRKKTEMHVCCVLNPKFKPNITKPTKFLPRQDGDLIISYDVTQSYEGNYIAQVLIDNKHPLGRLDSWNLTWEWMRGEFIYSMKGAYTHKIDYADCIYGDAGKFYKDFDFTPVMNCEKRPVISDLPPDREKDNVVGNIPFCCRNGSLLPTSMDGNKSKAAFELVVYKVPPDMNRTALYAPQHWKINGVLNPNYKCGPPIRVNPTEFPDKTGLTAVKYAIASW…
	L. chinense	Lchi34460	LcCOBL7	phytozome/This study	MVLRALLFTSFLVCYMVSNSHAQDYDEEKAAPPPALNNCNGIFLSYAFTSREKEFPHVKNATAQAYAFQATVMILNASPNDLKAWKMFIGFQHDEILVSADGAVIMDGEDLPARVGNGTYLSGYPQTDLKTSIETAADWNQIQVTIDLKGTQFGVKPPGIPMPKTIRLANDGYKCPAPVRKKTEMHVCCVLNPKFKPNITKPTKFLPRQDGDLIISYDVTQSYEGNYIAQVLIDNKHPLGRLDSWNLTWEWMRGEFIYSMKGAYTHKIDYADCIYGDAGKFYKDFDFTPVMNCEKRPVISDLPPDREKDNVVGNIPFCCRNGSLLPTSMDGNKSKAAFELVVYKVPPDMNRTALYAPQHWKINGVLNPNYKCGPPIRVNPTEFPDKTGLTAVKYAIASW…
