# Supplementary material for: Genome-Wide Analysis and Abiotic Stress-Responsive Patterns of COBRA-like Gene Family in Liriodendron chinense
Source: Plants (Basel). 2023 Apr 11;12(8):1616. doi: 10.3390/plants12081616 (PMC10143436; doi:10.3390/plants12081616)
Supplement: Supplementary file 1 [file plants-12-01616-s001.zip › Supplementary Table S2.xlsx]

## Sheet: Supplementary Table S2
Supplementary Table S2 Primer sequences of LcCOBL protiens for subcellular localization.
LcCOBL2-F	ATGGAGAGAGAGAGAGAGAGAGAG
LcCOBL2-R	CTAAGGTAATGAGGCCGGC
LcCOBL3-F	ATGGCCCCGCTATCAGG
LcCOBL3-R	AATAAACAAGAATGCCAAACACGC
LcCOBL4-F	ATGGGAATGGAAAGATTTGAAGACC
LcCOBL4-R	CTCAGAGCTTGCGTCTTCC
