# Supplementary material for: Genome-Wide Analysis and Abiotic Stress-Responsive Patterns of COBRA-like Gene Family in Liriodendron chinense
Source: Plants (Basel). 2023 Apr 11;12(8):1616. doi: 10.3390/plants12081616 (PMC10143436; doi:10.3390/plants12081616)
Supplement: Supplementary file 1 [file plants-12-01616-s001.zip › Supplementary Table S3.xlsx]

## Sheet: Supplementary Table S3
Supplementary Table S3 Primer sequences of LcCOBLs and reference genes in qRT-PCR.
GAPDH-F	ACAACTAACTGCCTTGCTCCTT
GAPDH-R	AGTCAGATCCACCACCGA AA
qLcCOBL1-F	CGATGAGAACGATGCTGTCC
qLcCOBL1-R	TGACCGTTACCTTCACCCTC
qLcCOBL2-F	TGGGTCGATGAGGAGAGAGA
qLcCOBL2-R	TCACCTTTTCTCCTCGCCTT
qLcCOBL3-F	CGTCATATTCAAGCACCGGG
qLcCOBL3-R	AGTTCCCGGCAGTAAATCCA
qLcCOBL4	GCCTTTCAAGTGAGTGTGGG
qLcCOBL4	GGGCCAAGCAATGTGAAGTT
qLcCOBL5-F	CGAGCAAATCCACATCAGCA
qLcCOBL5-R	ATGCCGTTGACTCTAACCCA
qLcCOBL6/7-F	ACGGCTTGCAAATGATGGTT
qLcCOBL6/7-R	GGTTTGGTGATGTTGGGCTT
